# Supplementary material for: Creb5 establishes the competence for Prg4 expression in articular cartilage
Source: PubMed Central journal article supplement (PMC7955038; doi:10.1038/s42003-021-01857-0), 2021-03-12
Supplement: 42003_2021_1857_MOESM1_ESM.pdf [file 42003_2021_1857_MOESM1_ESM.pdf]

**Supplementary Materials for:**

**Title: *Creb5* establishes the competence for *Prg4* expression in articular cartilage**

**Authors:** Cheng-Hai Zhang, Yao Gao, Unmesh Jadhav, Han-Hwa Hun, Kristina M Holton, Alan J. Grodzinsky, Ramesh A. Shivdasani, Andrew B. Lassar

**List of Supplementary Materials:**

Supplementary Figures 1-5

Supplementary Tables 1-10

Supplementary Data 1-2

Supplementary Figure 1

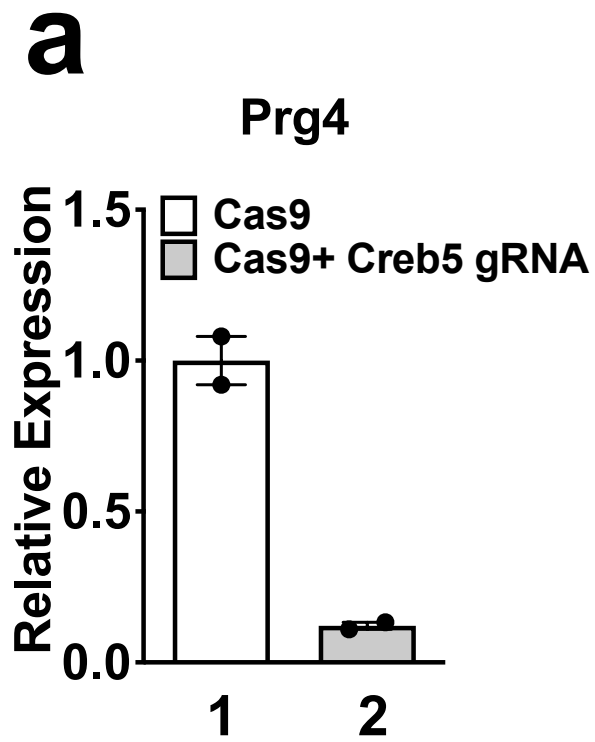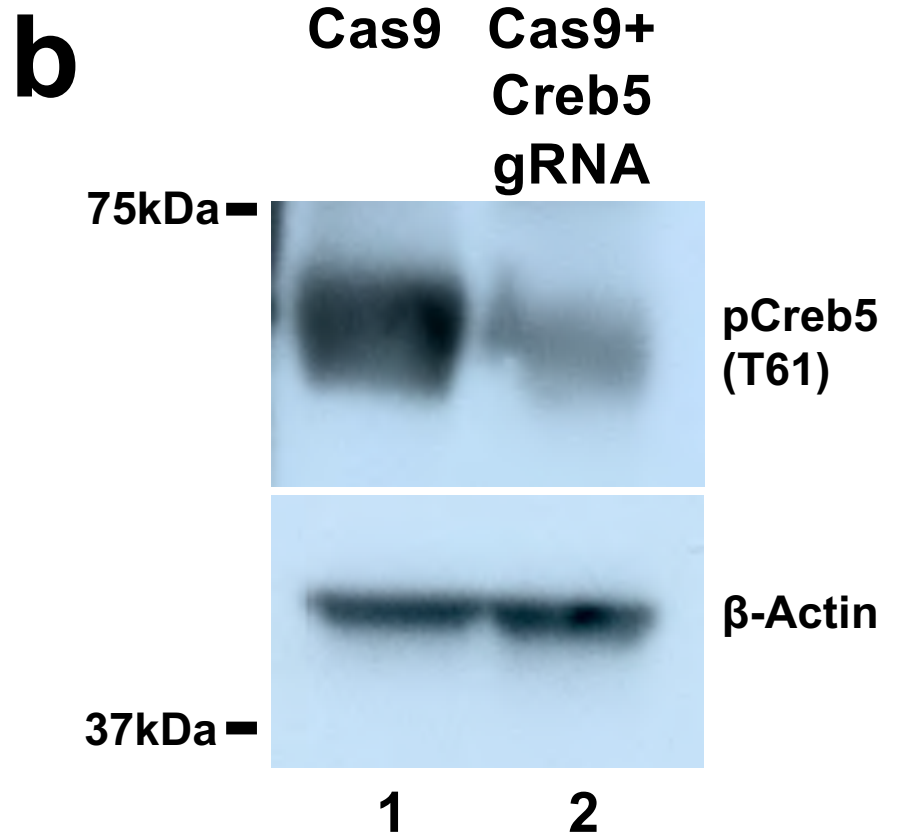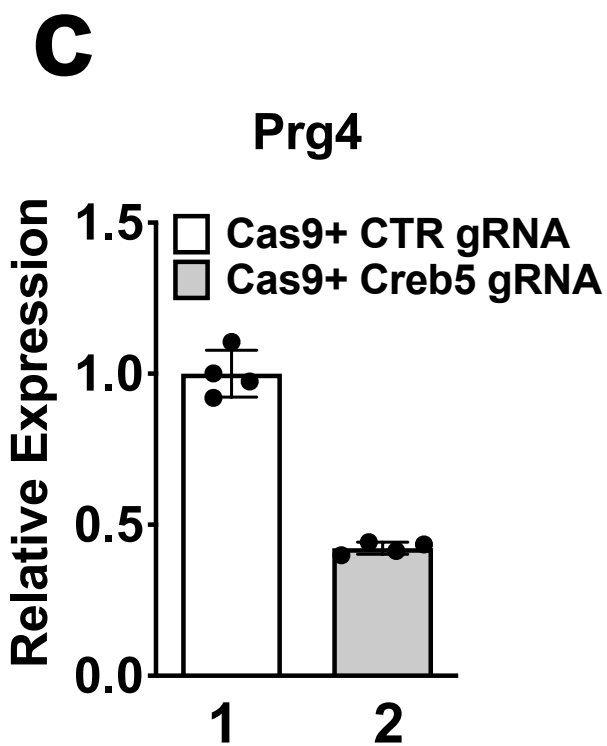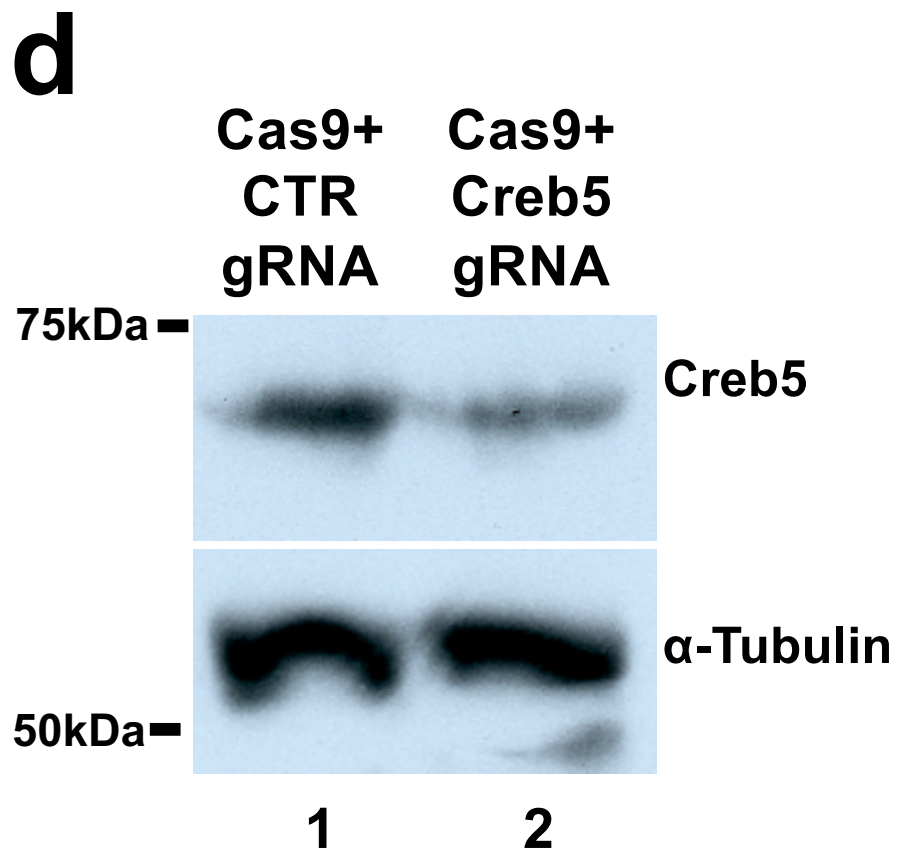

**Supplementary Figure 1. CRISPR-Cas9 mediated mutation of the DNA binding domain of *Creb5* in SZCs decreases the levels of both *Creb5* protein and TGF- $\beta$ 2-induced expression of *Prg4*.** SZCs were infected with a lentivirus encoding either (a & b) Cas9 alone (lane 1) or Cas9 plus a *Creb5* guide RNA (targeting the DNA binding domain, lane 2) or (c & d) Cas9 plus a control guide RNA (lane 1) or Cas9 plus a *Creb5* guide RNA (lane 2). After selection in puromycin, to increase the efficiency of *Creb5* mutation, cells were cultured for at least an additional 14 days, prior to assaying *Prg4* expression and *Creb5* protein levels. (a & c) Infected SZCs were cultured in ultra-low attachment dishes in the presence of TGF- $\beta$ 2 (20 ng/ml) for 3 days. Gene expression was assayed by RT-qPCR and normalized to *Gapdh*. Error bar indicates standard error of the mean (n=2 technical repeats for Supplementary Figure 1a, and n=4 technical repeats for Supplementary Figure 1c). Similar results have been obtained in 3 independent biological repeats. (b & d) Parallel SZC cultures to those displayed in (a & b) were cultured in the absence of TGF- $\beta$ 2 and total cell protein levels were assayed by immunoblot with antibodies directed against either phospho-*Creb5* (T61), total *Creb5*,  $\beta$ -actin or  $\alpha$ -tubulin, as indicated.

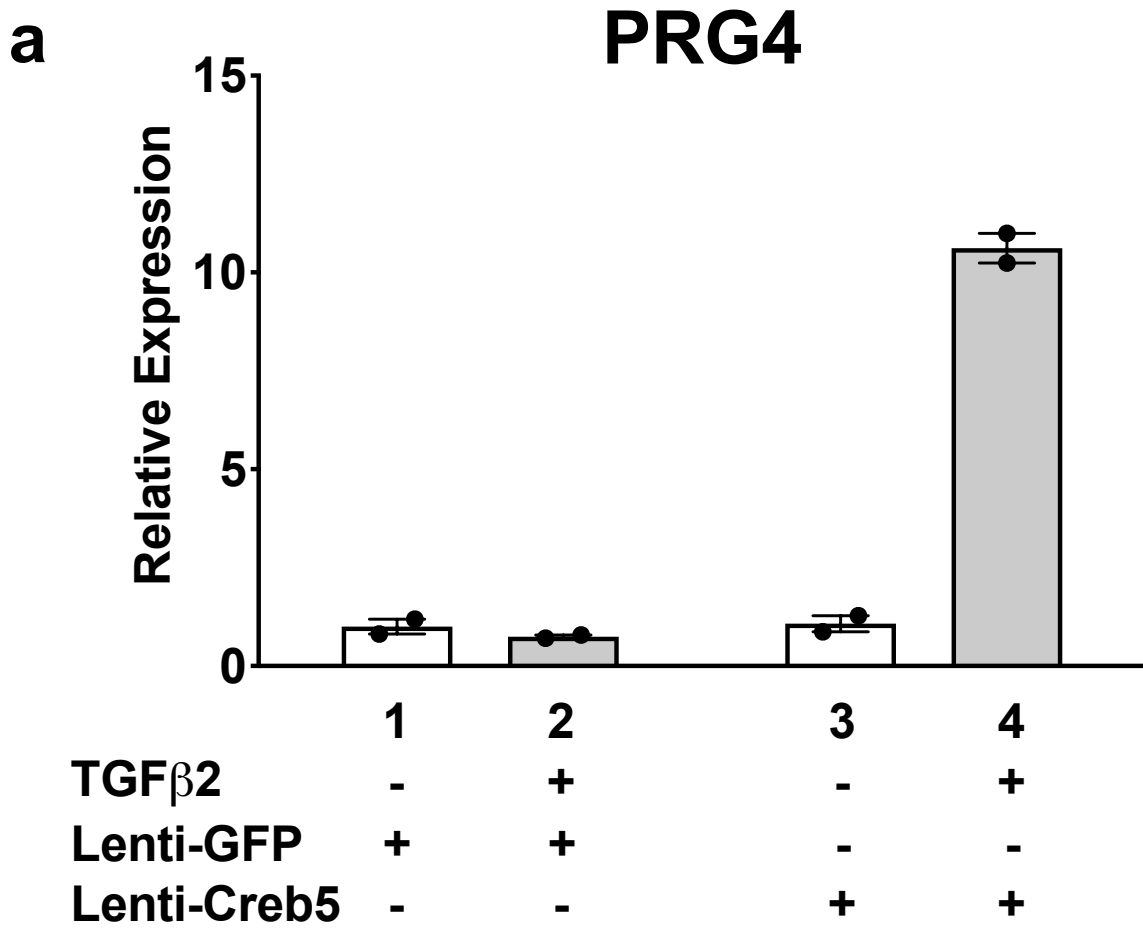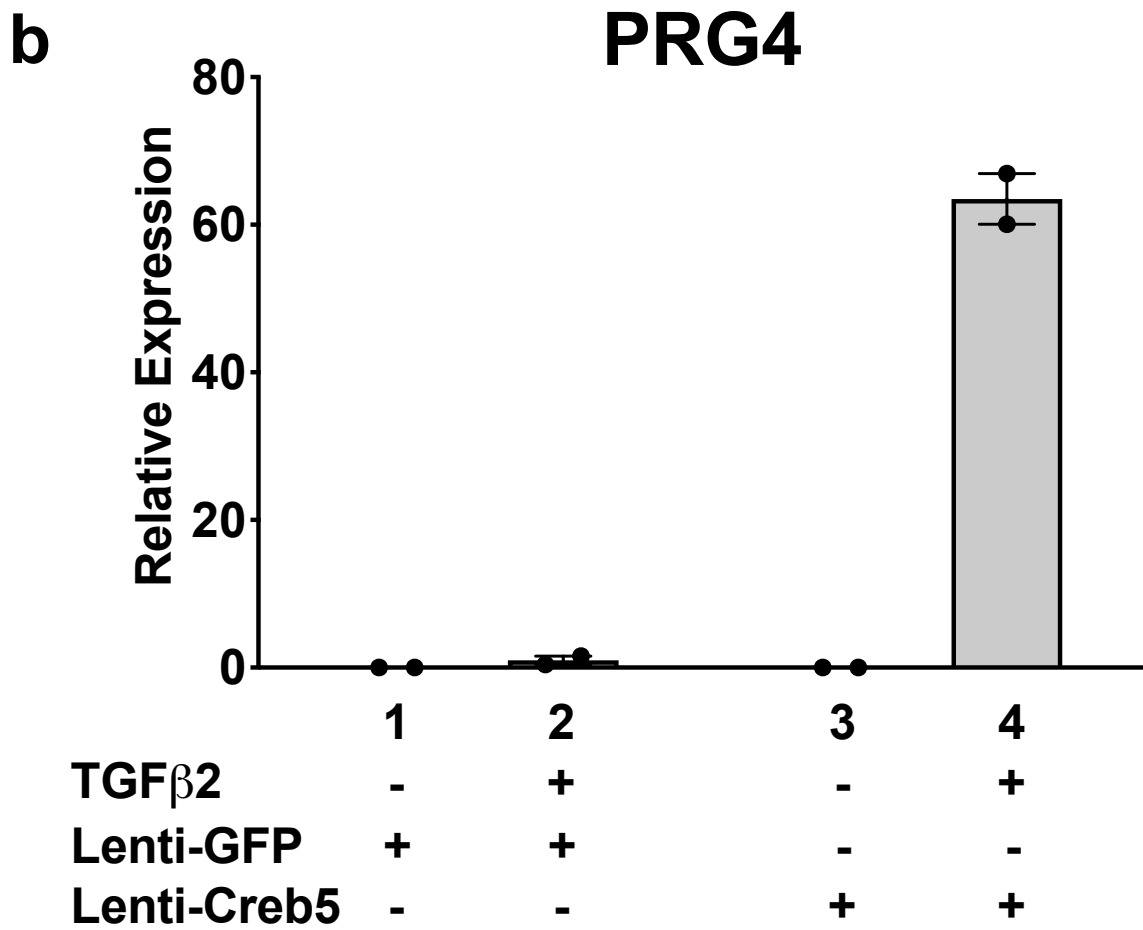



**Supplementary Figure 2. Exogenous Creb5 can promote TGF- $\beta$  dependent induction of *Prg4* expression in either a human chondrosarcoma cell line or in an immortalized human costal chondrocyte cell line.** (a) Sw1353 human chondrosarcoma cells (ATCC HTB 94) or (b) immortalized human costal chondrocyte (C-28/I2; <sup>49</sup>) cells were infected with control lentivirus (Lenti-GFP) or Lenti-Creb5. After selection in puromycin, the cells were cultured in either the absence (white) or presence (grey) of TGF- $\beta$ 2 (20 ng/ml) for 3 days in ultra-low attachment plates. Gene expression was assayed by RT-qPCR and normalized to *GAPDH*. Error bar indicates standard error of the mean (n=2 technical repeats). Similar results have been obtained in 3 independent biological repeats.

# Supplementary Figure 3

**a**

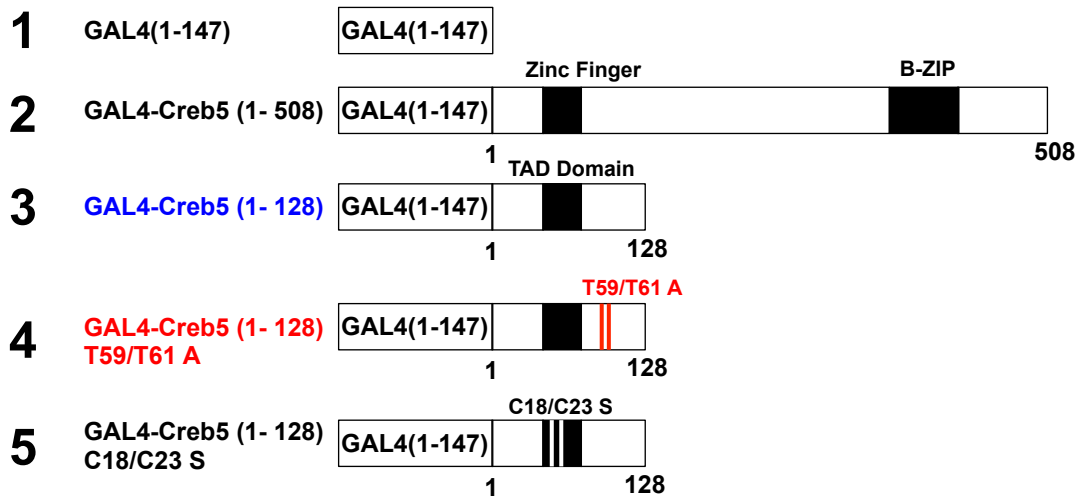

**b**

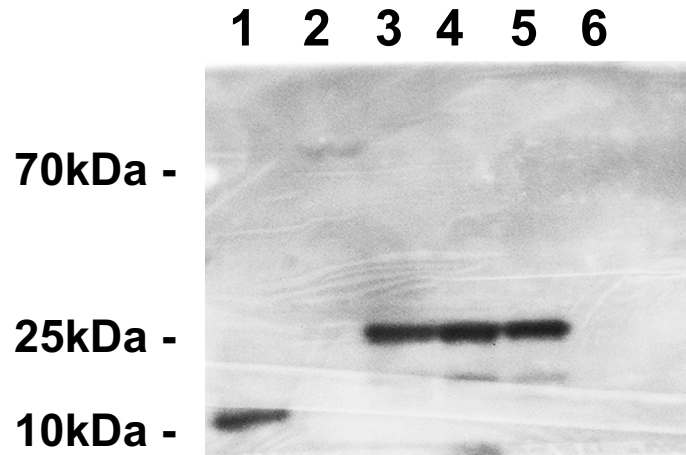

**c**

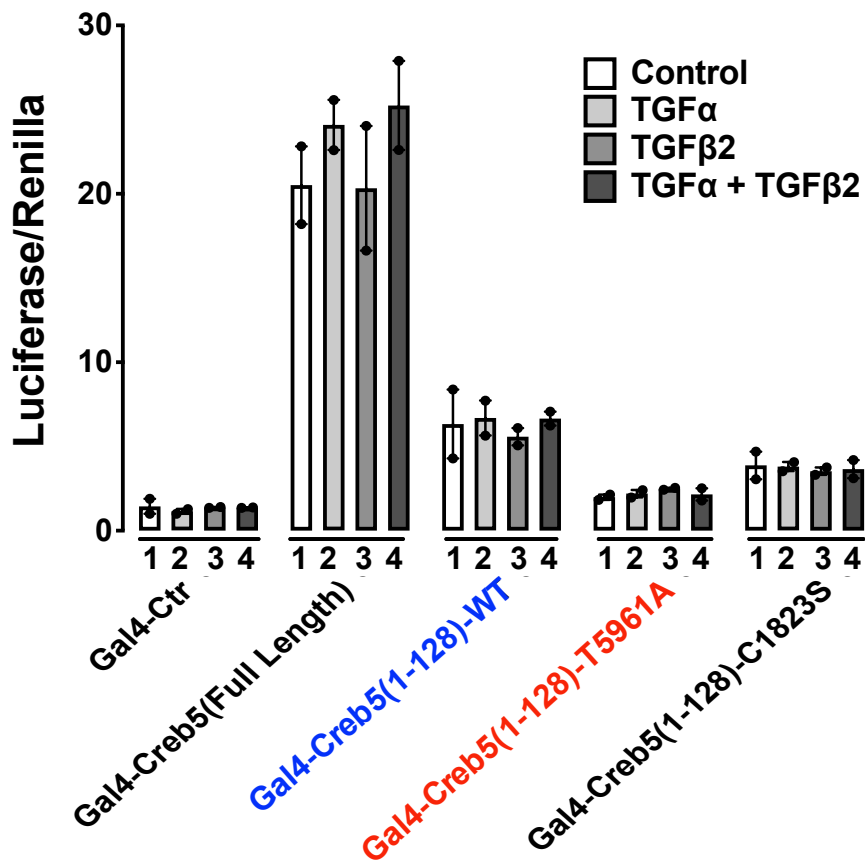

**Supplementary Figure 3. The amino-terminus of Creb5 contains a relatively weak transcriptional activation domain, which requires both SAPK phosphorylation sites and an intact zinc finger domain for maximal activity.** (a) Diagrams of GAL4 DNA binding domain fusions with either full length Creb5 (1-508) or with the N-terminus of Creb5 (1-128). Mutations in either the SAPK phosphorylation sites (T59/T61A) or in the zinc finger domain (C18/C23S) are displayed. (b) Expression of various GAL4 DNA binding domain fusions (as numbered and diagrammed in (a) in transfected 293T cells, as detected by a GAL4 western blot. Lane 6 is derived from non-transfected 293T cells. (c) Superficial zone bovine articular chondrocytes were transfected with various GAL4-Creb5 constructs, plus a GAL4-firefly luciferase reporter and a CMV-renilla luciferase reporter; cells were cultured in either the absence or presence of TGF- $\beta$ 2 (20 ng/ml) and TGF- $\alpha$  (100 ng/ml), as indicated for 3 days. Relative expression of firefly/renilla luciferase is displayed. Error bar indicates standard error of the mean (n=2 technical repeats).

Supplementary Figure 4

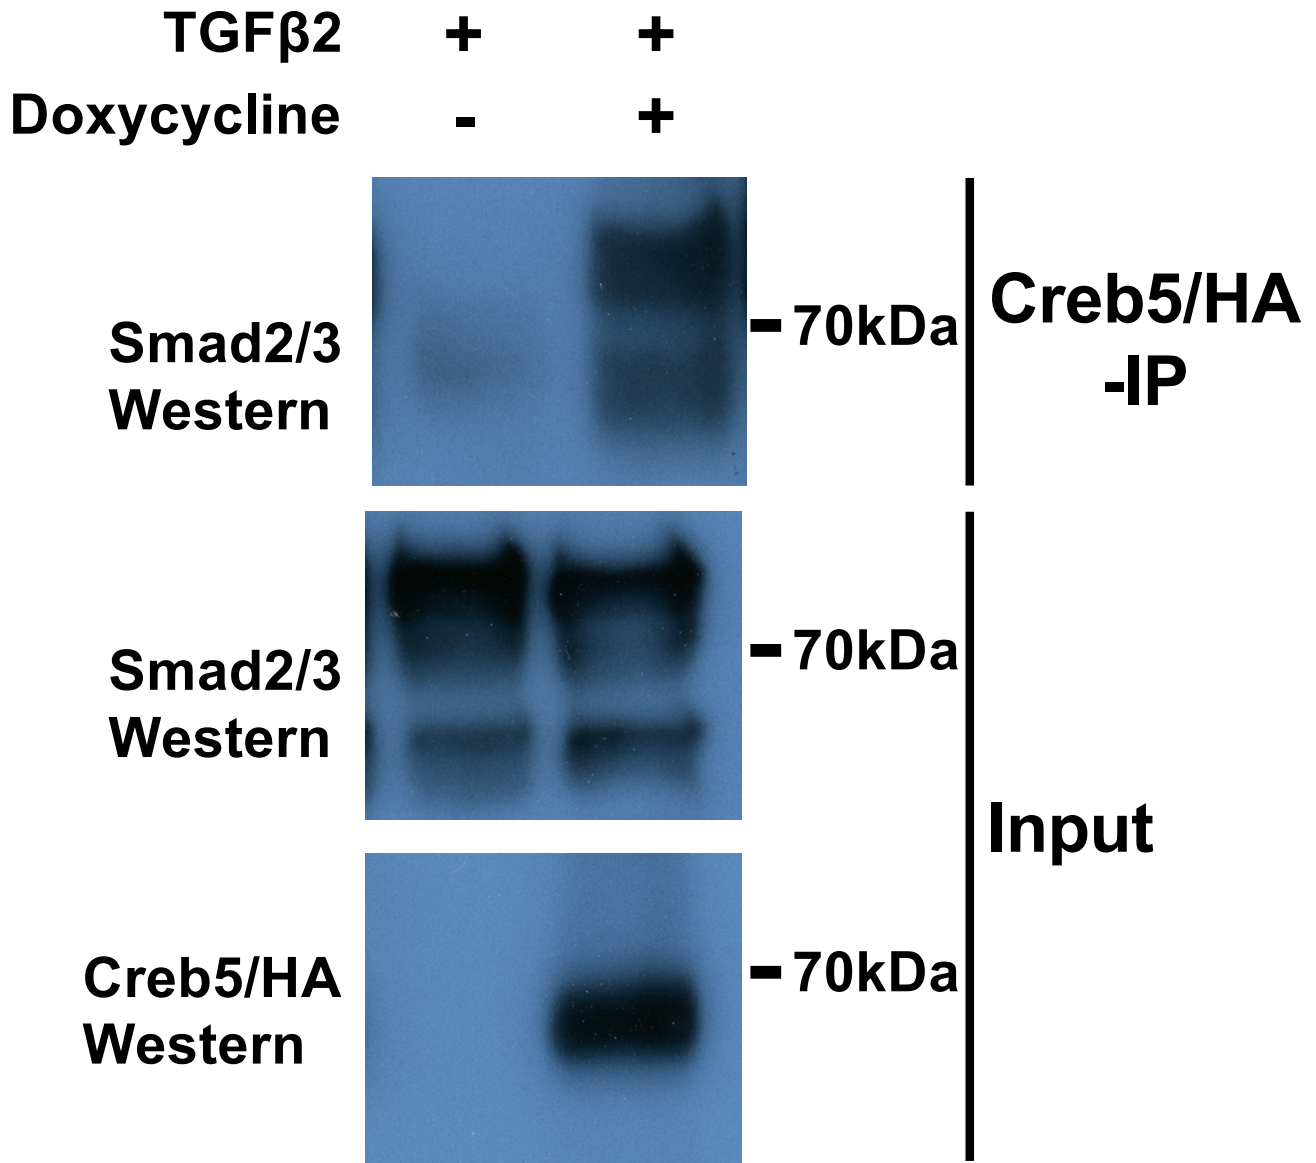

**Supplementary Figure 4. Creb5 can co-immunoprecipitate Smad2/3.** Deep zone bovine articular chondrocytes that were programmed to express doxycycline-inducible Creb5 lentivirus (DZC-iCreb5-HA) were cultured in ultra-low attachment dishes in the presence of TGF- $\beta$ 2 (20 ng/ml) with or without doxycycline (1 $\mu$ g/ml) for 3 days. After 3 days culture, cells were collected and co-immunoprecipitation was performed using monoclonal anti-HA agarose. Immunoprecipitated protein was detected using anti-Smad2/3 antibody in western blot. Input protein was detected using anti-Smad2/3 and anti-HA antibody.

# Supplementary Figure 5

Uncropped blot images of the indicated figures (page 1 of 8)

Figure 2a

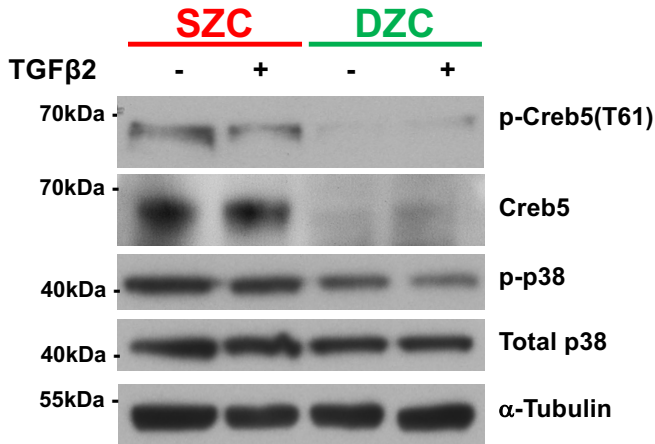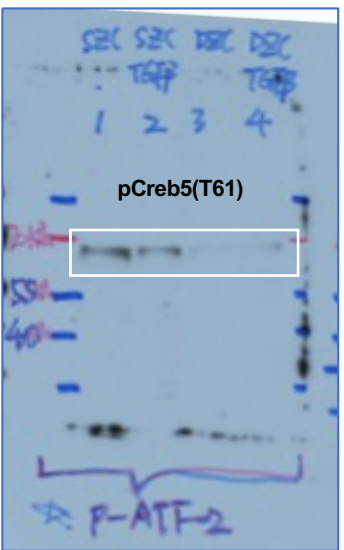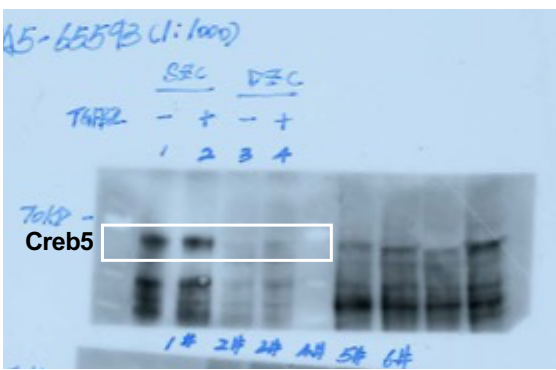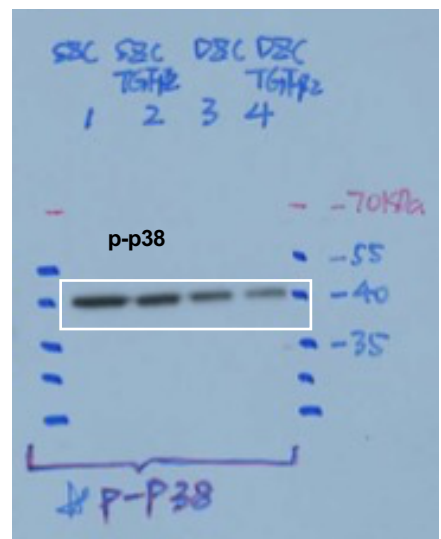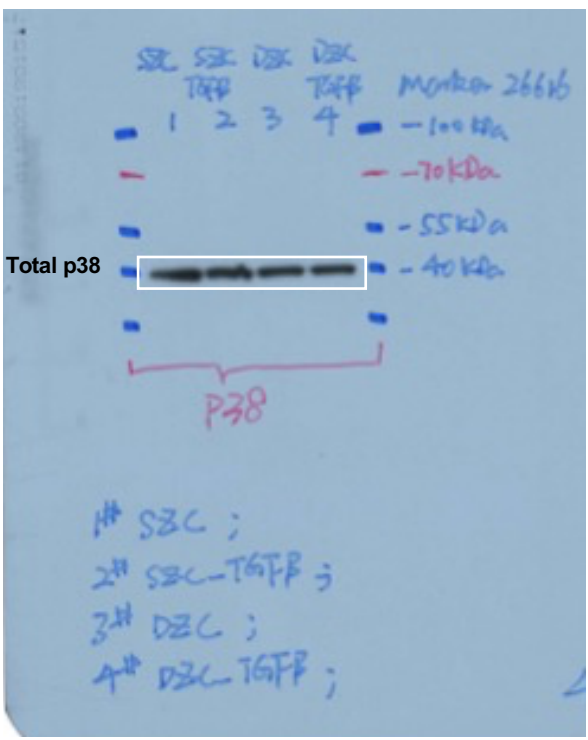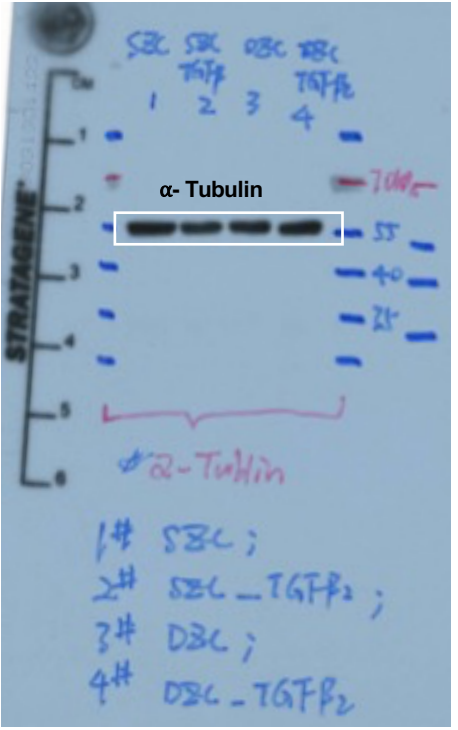

# Supplementary Figure 5

Uncropped blot images of the indicated figures (page 2 of 8)

Figure 3c

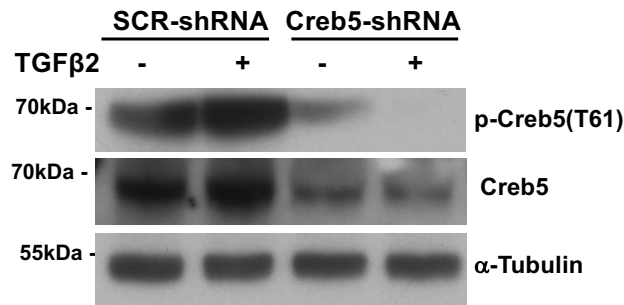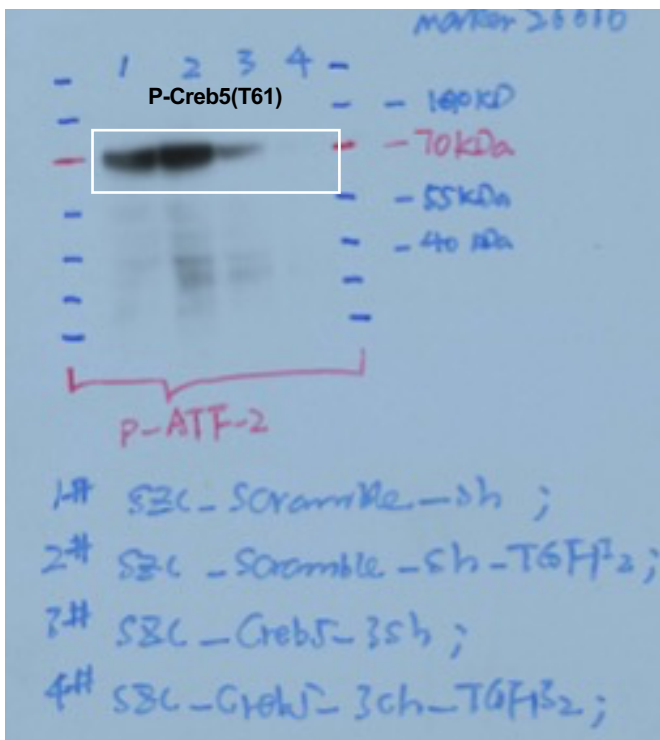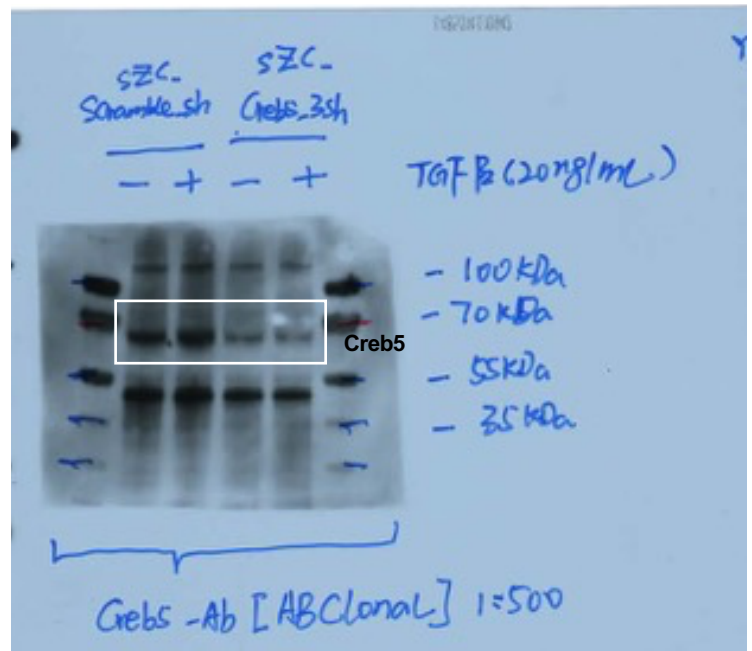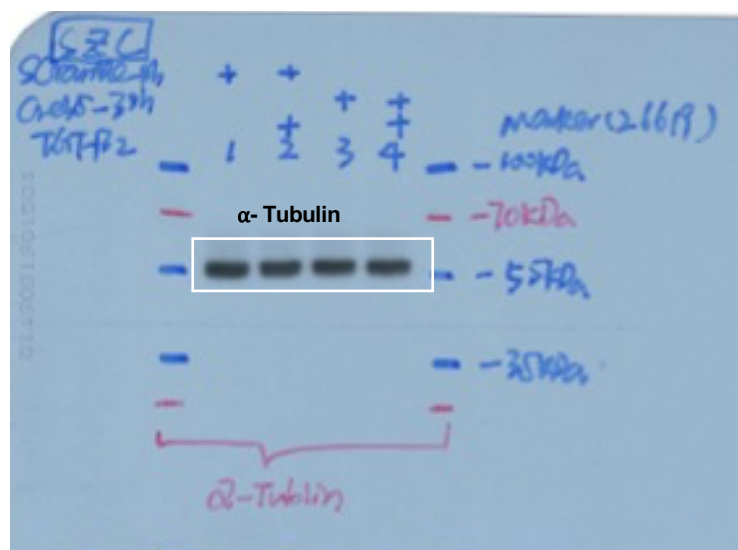

# Supplementary Figure 5

Uncropped blot images of the indicated figures (page 3 of 8)

Figure 4b

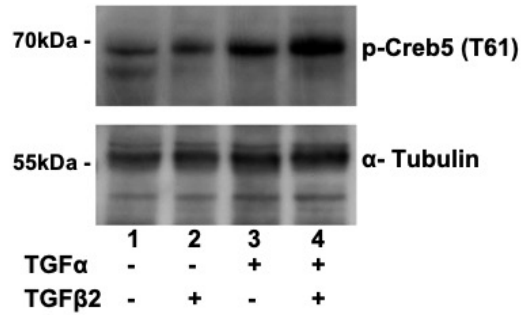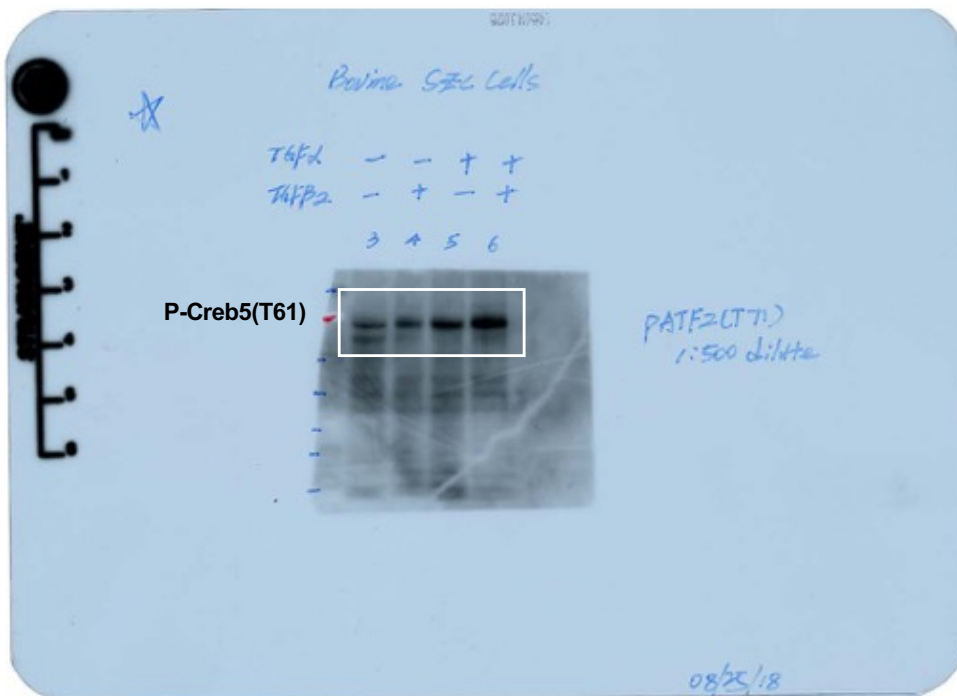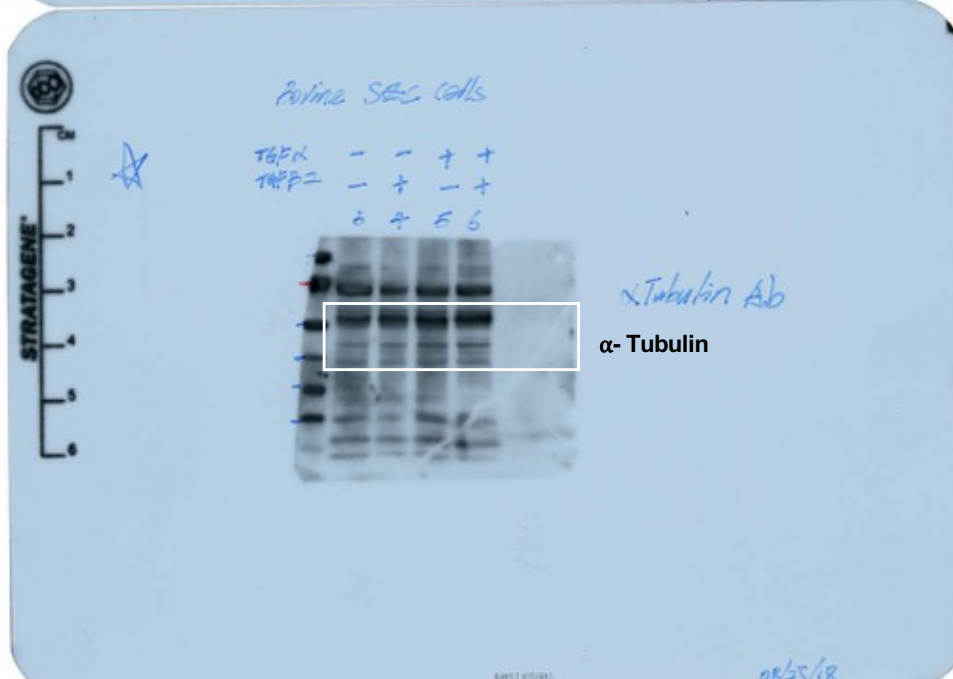



# Supplementary Figure 5

Uncropped blot images of the indicated figures (page 4 of 8)

Figure 5c

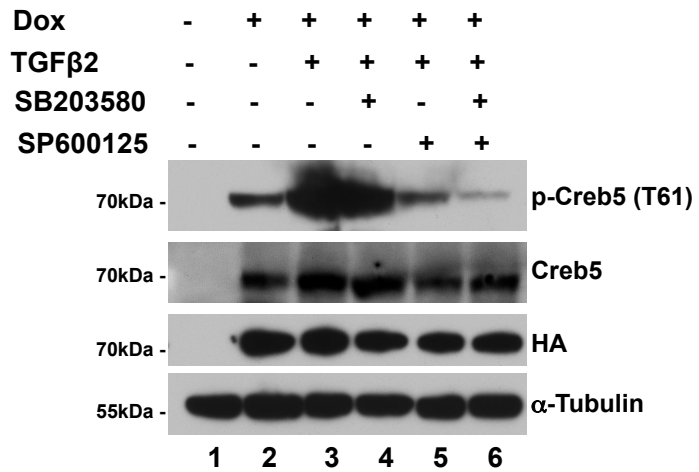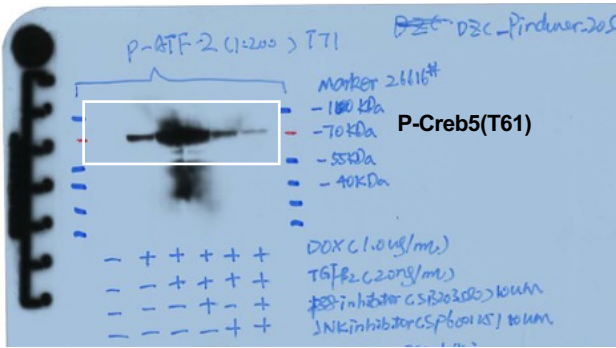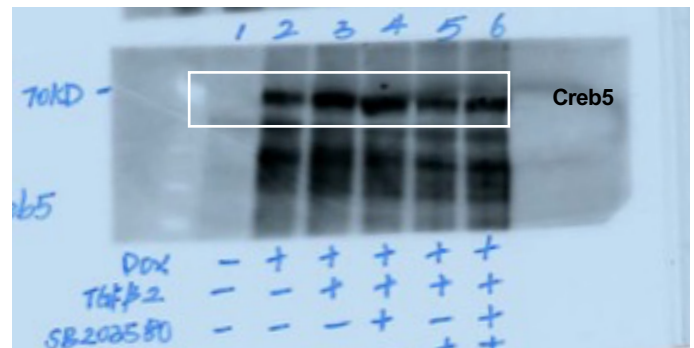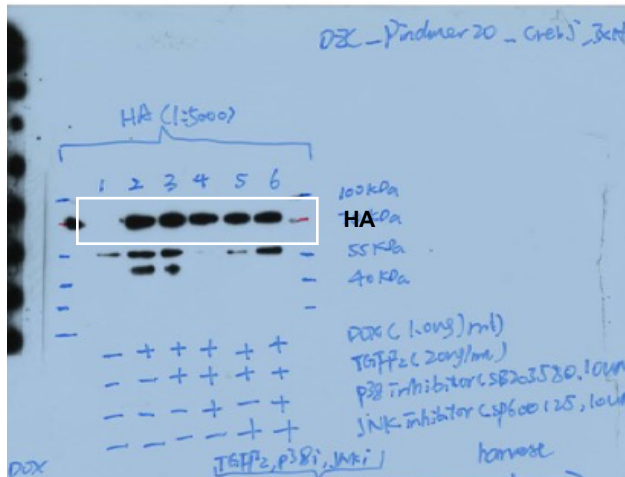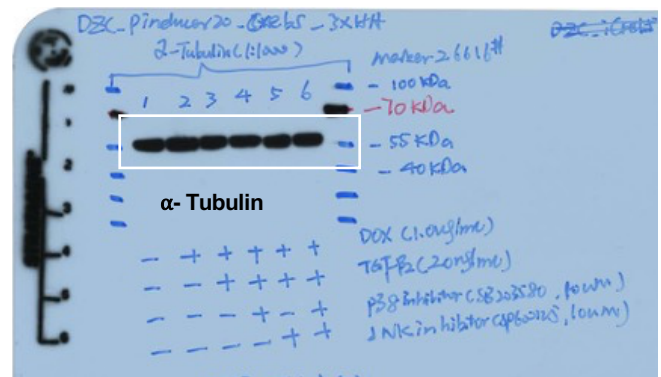

# Supplementary Figure 5

Uncropped blot images of the indicated figures (page 5 of 8)

Figure 5d

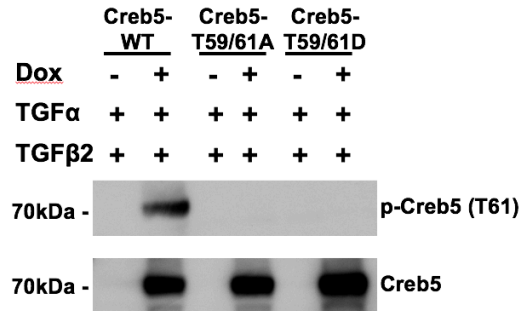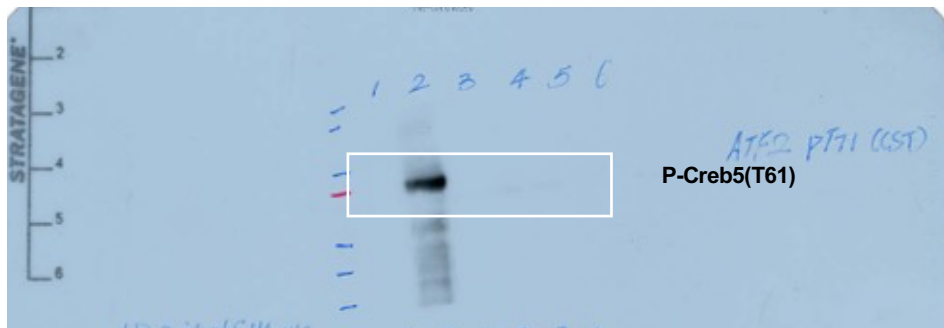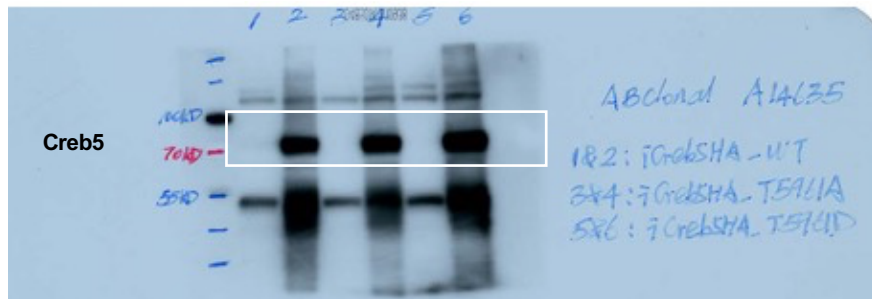

# Supplementary Figure 5

Uncropped blot images of the indicated figures (page 6 of 8)

## Supplementary Figure 1b

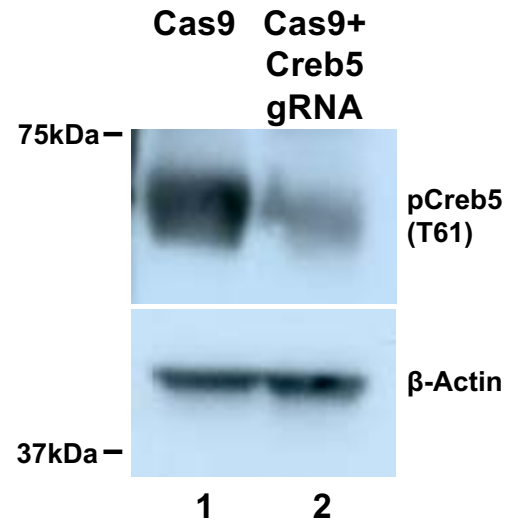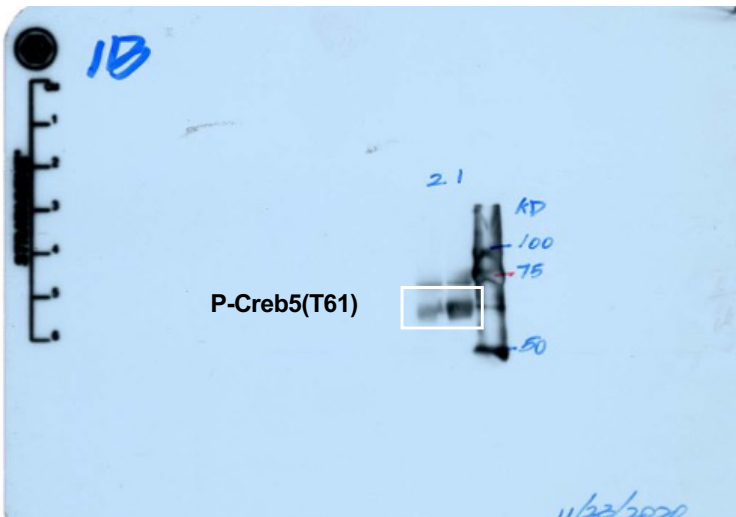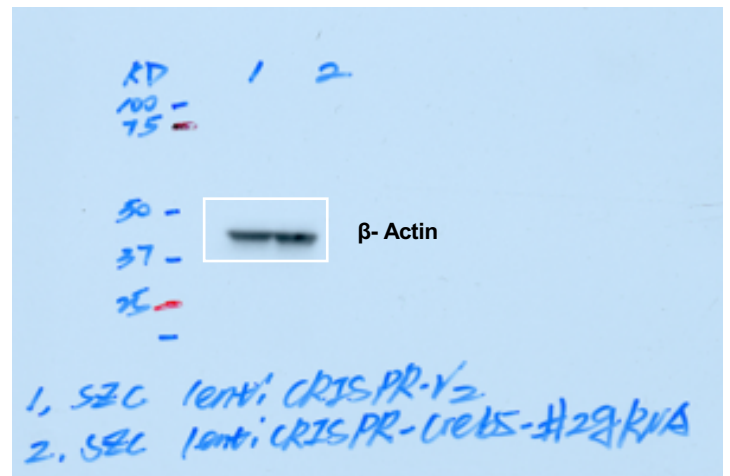

# Supplementary Figure 5

Uncropped blot images of the indicated figures (page 7 of 8)

## Supplementary Figure 1d

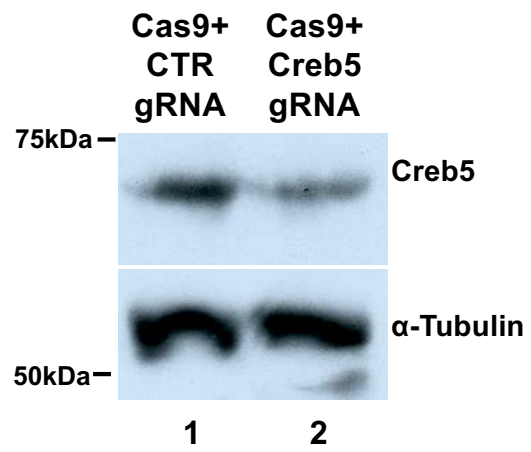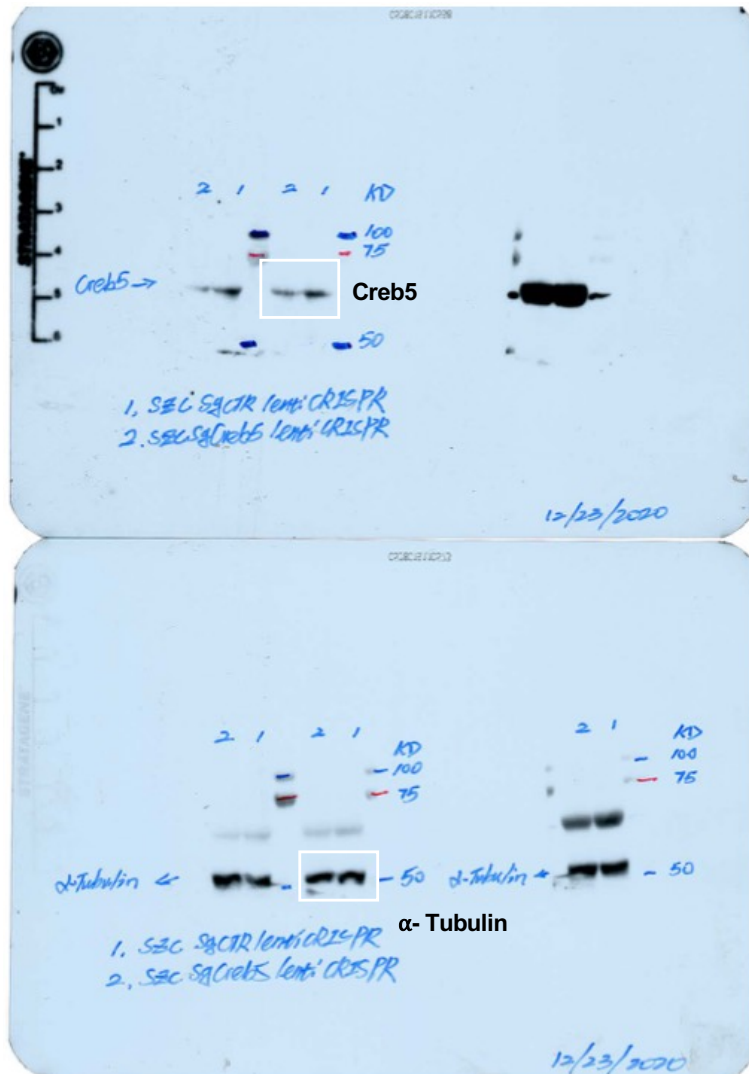

# Supplementary Figure 5

Uncropped blot images of the indicated figures (page 8 of 8)

## Supplementary Figure 4

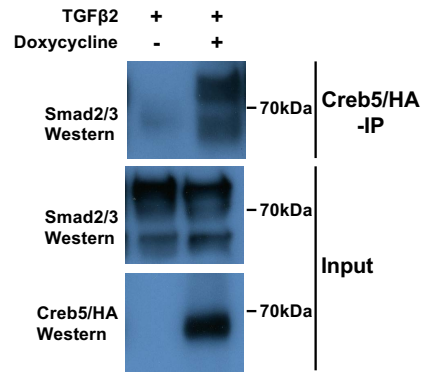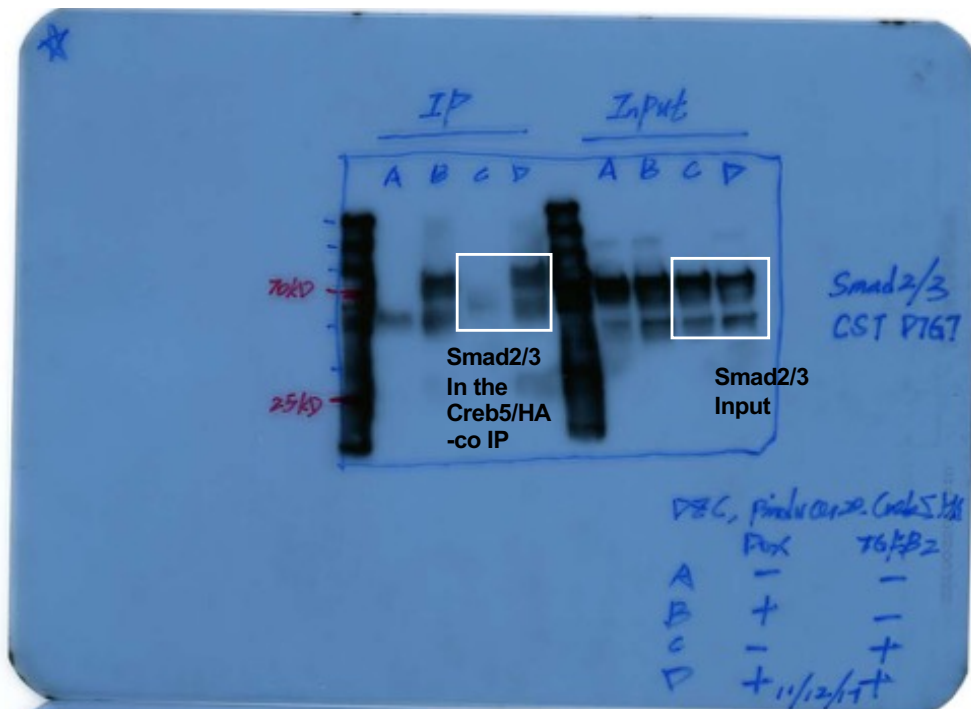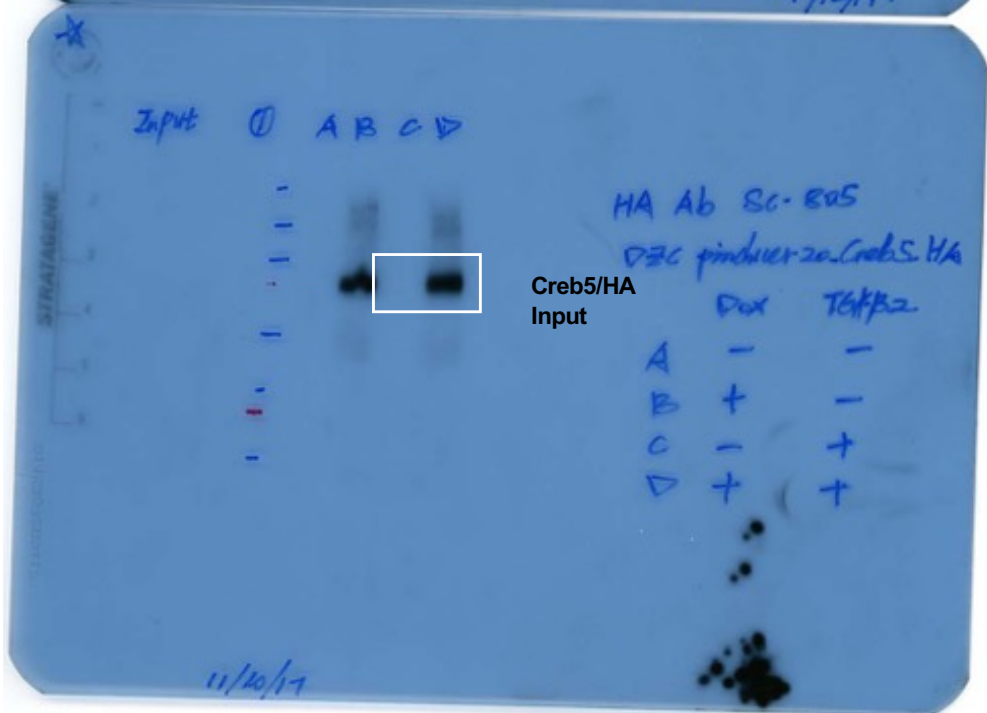

**Supplementary Figure 5. Uncropped blot images of the indicated figures.**

**Supplementary Table 1 : RT-qPCR Primers to amplify bovine cDNA**

| <b>Gene</b>                                                                           | <b>Forward</b>          | <b>Reverse</b>          |
|---------------------------------------------------------------------------------------|-------------------------|-------------------------|
| <b><i>Prg4</i></b>                                                                    | CTTGATTCAGCAAGCTTCTTCTC | ACAGGAAAGCTCCACAGTGC    |
| <b><i>Creb5 (Primers 1)</i></b><br><i>Both primers are in the Creb5 coding region</i> | AGGCGGCGGAAATTTCTG      | CATGGCTGTTATGGGGCA      |
| <b><i>Creb5 (Primers 2)</i></b><br><i>The reverse primer is in the Creb5 3' UTR</i>   | AGACTGCCCCATAACAGCCATG  | GCTCTTCTTGAAGGCAAGGTGC  |
| <b><i>EphA3</i></b>                                                                   | GCTGATGCTAGACTGCTG      | CGGAAGGTAGTAATGTCTG     |
| <b><i>Thbs4</i></b>                                                                   | ACACCAGTGACCAGGTCAGGCT  | GGAGAAGCAGAACACGCCGA    |
| <b><i>Gapdh</i></b>                                                                   | TGGTGAAGGTCGGAGTGAAC    | TGTAGACCATGTAGTGAAGGTCA |

**Supplementary Table 2 : ChIP-PCR Primers**

|                               | <b>Forward</b>        | <b>Reverse</b>      |
|-------------------------------|-----------------------|---------------------|
| <b><i>Prg4</i> Enhancer1</b>  | AAAAACACTCTTTGCTGG    | AGATGGTAAATTGCTTGG  |
| <b><i>Prg4</i> Enhancer2</b>  | AAGTGAGTTGTCGCTTAAA   | AAACCAGTTGAACCATCT  |
| <b><i>Prg4</i> Enhancer3</b>  | AGGTACCACGGCTGTTAC    | CAGTGTTTCAGACAGCAG  |
| <b><i>Prg4</i> Enhancer4</b>  | GTTTTCAATTGGAAAGCATTG | CACAGCCAAAACAATTATC |
| <b><i>GAPDH</i> ATAC PEAK</b> | ACACAGGCGCTCCTGGGAAA  | TTCCGCCCTCACGTCCAG  |

**Supplementary Table 3: *Prg4* Promoter and Enhancer E1,E2,E3,E4 sequences**

|                 |                                                                                                                                                                                                                                                                                                                                                                                                                                                                                                                                                                                              |
|-----------------|----------------------------------------------------------------------------------------------------------------------------------------------------------------------------------------------------------------------------------------------------------------------------------------------------------------------------------------------------------------------------------------------------------------------------------------------------------------------------------------------------------------------------------------------------------------------------------------------|
| <b>Promoter</b> | TAAAGGTGCTTGAAAAGATTTATAAGGATAGTAGTTGGAGAGTTTAGAAAAGA<br>ATCACATTTATGCAATACACCTGCCGGAGGCTTATGAATTTATATTGAGAGTTA<br>AGAGAATGTTGGAATGATAACTGTAAATTAATTTACTAAAGCTGGTACTT<br>ATTTTTCCCTTCAATATAGGATTTAAACCTTGTACTTTAAGAACATGCTATAAT<br>TTGAATAGAGTTTTAAGATAAGTCTTTTTTTCTATTTGGGAGATTCTAAAGTATT<br>AAAATGGTCAGTAATGTGGTTGAGATGGTGATTTGATGATTTTTTTTTTTCTGT<br>ATAAGATTAATCTAATGGTCAAGTATTTACAATGAATTAAGGCTGGTTATTTT<br>TAAAAGTCTTGCTTTAAGAATGGGAAAGTTTTTTTTATCATTAAATTGAATTTTG<br>AAATTATTGAAATGCTGTAATACAAGCATAAATTAGTGGTGAGATCCAAGAGGC<br>GTTTCTAATACTTTTATTTTCTTTTCAGCGAGGGCTCAGTACCTGAAAACAGCC |
|-----------------|----------------------------------------------------------------------------------------------------------------------------------------------------------------------------------------------------------------------------------------------------------------------------------------------------------------------------------------------------------------------------------------------------------------------------------------------------------------------------------------------------------------------------------------------------------------------------------------------|

|           |                                                                                                                                                                                                                                                                                                                                                                                                                                                                                                                                                                                                                                                                                                                                                                                                                                                                                        |
|-----------|----------------------------------------------------------------------------------------------------------------------------------------------------------------------------------------------------------------------------------------------------------------------------------------------------------------------------------------------------------------------------------------------------------------------------------------------------------------------------------------------------------------------------------------------------------------------------------------------------------------------------------------------------------------------------------------------------------------------------------------------------------------------------------------------------------------------------------------------------------------------------------------|
| <b>E1</b> | AGAAAACCTTATGCCATAAGCTGAAACTAGATAAAAGTTTCAAAAACACTCTTTGC<br>TGGGTAACTGGAAAAAGAAAAAAGAAATGATACCAGCATTGACTATTT<br>TAAAGTTGTTGCACTAGTCAAAGCCTGCCAAGCAATTTACCATCTCACAGAACA<br>ATTTGTTCACTTCACTTAGAAATTAGAAGTGTGTTTGGGCCAATAAAGCTAAAT<br>TTGTAGTAGTCATTTTTATTAACGGAAGTGTTTTCCAGATGTTACTTAAGTCTG<br>GTTGTCTGGGACCTGTTCCAATAAATGAGGAAAGTTTGATTTCATAGGTTGTCA<br>CTGTTGATTCTGTCTAACCTTTGGACTAATTGGTTCATCCTAACATATTTGCTCC<br>GGTATATAAGAGCATTGGACATTGGAGAAATTCACCTCTCCTTTTACGGGTAAG<br>TGTCACAGTTAACTTGCTTCATGGAGTTATATGTTTTCAATTCAATAAGGATTTA<br>TTAAAAGTTTATT                                                                                                                                                                                                                                                                                                                                  |
| <b>E2</b> | TTCAATTTTCCATTGGAGATACGTTTCTCTCTGTTTTCGCTCCAACCCAGGGCTC<br>ACTCCCTCTGCTTCCCTTCTACCTTGCTTTACTATGCAGAATGCCTGAATGCTGGC<br>CAGCTTTTCCTTTGCTAAGGGCTTATGAAATTCCTATTTCAACCAAGCGGTCTCT<br>TTTGGGAAGGCCACATGGGAGTGCAAAGTGAGTTGTGCTTAAAAAATAAAT<br>TTTTCCGGATCATTGCATTACACAATCTGTAGTTTCTTGACTTTCCCTGTGTCAA<br>CTAATTTTTTAGATTCAAAGCAGAGCCACAGATGGTTCAACTGGTTTCTCAA<br>AGTTTTAAACAATCCCAACTTTAGTTTTACTGGCATTCGAATAAATTGCTCTGCC<br>TTTTCCCTCCTCTGGTATTCTACCTGCCTTGTACTGAATAAAGATAGATGGTTC<br>TGTGTAAGACTGTGTCAACTATTTACGTCTAGATTTATCTTTTTTGGCTTTTTAC<br>TTCTTTTTCTCCTTAAGTTCCCACATTCCTTTTCTACAGGAAGCATGGAAAAGAT<br>AAAGGTGCCAGGAAAGATATTAGTTTTTGGCTGCTGGC                                                                                                                                                                                                                                          |
| <b>E3</b> | AGGGTATGTCTTGCTTCTCTTCCCAGGCATGCTTTTGAAAATCCTCCTGCCTCT<br>CTCTCCTTGACCAACAAGCCCTGTCTGCAGTCATGTTTCTCACTCACAGGAAGT<br>CAGTAATCCCTCAGGGGCTAGGGGTTTACTGTGTGTTCCCTTCTCAGAGAGTGG<br>GCAAACAAACGAATTCATCCTGCAGCAGCGATTGCCAGCTTTGAGCTGCCAGG<br>GTTTCCCTGGAACAAGTCTGCTCAGTGTGTAATGCACCAGGCAACATCTAGAATC<br>CCTCCTCAGCAGGGAGCATTTTATAGGGTGATAGAGCCGACCCATCTTTGAAAT<br>TGTCTTTTTCTGTTGGTGTGCTCAGGGTTTTTCAGGGCTCTCTGCTTTTAGAGC<br>ACTGGCTCTAAGAGGTACCACGGCTGTTACAGTGATGAGTCATCATGACTCCAT<br>GGGAGTGTGGAGGAGACCAAGGATGAGTCAGTAGTCTGTCTGTTTATTACAT<br>CTCATCTTGTTTACATATTCTGCTGTCTGAAACACTGTCTTTTCTGGTTTTGAAT<br>AACTGCTTTGTTCTCTCCCTCCCTTACAGAAACATTGCACTCCGTTTAGGTAC<br>CAAGTTGGGGGGGTGCTTGAAAATGAGATAATGGCCATCGTGAATAGGCTCC<br>ACTAATAAGGAGGTAGTTCTGAAACCGAACTCTGGTTGGATCTCACTTTGTTTT<br>CCTCTCAGTGGTGACTCCCATGTTACTGTAACATGGTCAAGTGTGCGCTGCCCA<br>GGATTCATCCAAAACCTATTTGTAATCTGTCTGAGGGGAATAGGGA |
| <b>E4</b> | GGAAAACCTATTAATCAGCATAGTGGAGGAACATTTCTTAACTCTTCAATGTTTT<br>CATTGGAAAGCATTCCAAAATAATGGAGACAACACCCTTGTAATTAATAATCTC<br>CAAGTGCAGAGTTCCTGCAGCTTTTCAGATGGACCTATGAGATGACCTTCTTATT<br>CATTCACTCTGATAAATTGTTTTGGCTGTGAGACAAAAACTAAGAATTTAT<br>TTTGGGCAGAGGATGGATCGGGAGGGAAGATGATTAGAGAATGATCAATCATT<br>GAGAGAACCATATTAATAGAGGCAATAGTTTATGCCACCAGGGGCAGGTCAGA<br>TTACTTGAG                                                                                                                                                                                                                                                                                                                                                                                                                                                                                                                     |



**Supplementary Table 4: Sequence of dCas9-KRAB guide RNAs that target the bovine Prg4 enhancers**

|                  |                             |
|------------------|-----------------------------|
| <b>E1-1#gRNA</b> | G CTC CGG TAT ATA AGA GCA T |
| <b>E1-2#gRNA</b> | T CAT CCT AAC ATA TTT GCT C |
| <b>E2-1#gRNA</b> | G ATT GTG TAA TGC AAT GAT C |
| <b>E2-2#gRNA</b> | A AGG CAG GTA GGA ATA CCA G |
| <b>E3-1#gRNA</b> | TTAGTGGAGCCTATTCACGA        |
| <b>E3-2#gRNA</b> | AGACAATTTCAAAGATGGGT        |
| <b>E3-3#gRNA</b> | ACTCCGTTTAGGTACCAAGT        |
| <b>E4-1#gRNA</b> | A TTT TGG GCA GAG GAT GGA T |
| <b>E4-2#gRNA</b> | GTAATCTGACCTGCCCTGG         |

**Supplementary Table 5: Antibodies employed for Western Blots**

| <b>Cat. No.</b>  | <b>Concentration</b> | <b>Target</b>                      | <b>Host</b>   | <b>Vendor</b>                    |
|------------------|----------------------|------------------------------------|---------------|----------------------------------|
| <b>PA5-65593</b> | <b>1:1000</b>        | <b>Creb5</b>                       | <b>Rabbit</b> | <b>Thermo Fisher</b>             |
| <b>9221S</b>     | <b>1:500</b>         | <b>p-Creb5</b>                     | <b>Rabbit</b> | <b>Cell Signaling Technology</b> |
| <b>9211S</b>     | <b>1:1000</b>        | <b>p-p38</b>                       | <b>Rabbit</b> | <b>Cell Signaling Technology</b> |
| <b>9212S</b>     | <b>1:1000</b>        | <b>P38</b>                         | <b>Rabbit</b> | <b>Cell Signaling Technology</b> |
| <b>T9026</b>     | <b>1:1000</b>        | <b><math>\alpha</math>-Tubulin</b> | <b>Mouse</b>  | <b>Sigma</b>                     |
| <b>ab9110</b>    | <b>1:1000</b>        | <b>HA</b>                          | <b>Rabbit</b> | <b>abcam</b>                     |
| <b>sc-805</b>    | <b>1:1000</b>        | <b>HA</b>                          | <b>Rabbit</b> | <b>Santa cruz biotechnology</b>  |
| <b>A14635</b>    | <b>1:1000</b>        | <b>Creb5</b>                       | <b>Rabbit</b> | <b>ABclonal</b>                  |
| <b>sc-510</b>    | <b>1:500</b>         | <b>GAL4</b>                        | <b>Mouse</b>  | <b>Santa cruz biotechnology</b>  |
| <b>8685S</b>     | <b>1:1000</b>        | <b>Smad2/3</b>                     | <b>Rabbit</b> | <b>Cell Signaling Technology</b> |
| <b>A5316</b>     | <b>1:5000</b>        | <b><math>\beta</math>-Actin</b>    | <b>Mouse</b>  | <b>Sigma</b>                     |

**Supplementary Table 6: Antibodies employed for either ChIP or co-immunoprecipitation (Co-IP)**

| <b>Cat. No.</b> | <b>Concentration</b>                  | <b>Target</b> | <b>Host</b>   | <b>Vendor</b> |
|-----------------|---------------------------------------|---------------|---------------|---------------|
| <b>ab9110</b>   | <b>5 <math>\mu</math>g per ChIP</b>   | <b>HA</b>     | <b>Rabbit</b> | <b>abcam</b>  |
| <b>ab46540</b>  | <b>5 <math>\mu</math>g per ChIP</b>   | <b>IgG</b>    | <b>Rabbit</b> | <b>abcam</b>  |
| <b>A2095</b>    | <b>25 <math>\mu</math>l per Co-IP</b> | <b>HA</b>     | <b>Mouse</b>  | <b>Sigma</b>  |

**Supplementary Table 7: Antibodies employed for immunohistochemistry**

| <b>Cat. No.</b>    | <b>Concentration</b> | <b>Target</b>                                   | <b>Host</b>   | <b>Vendor</b>                    |
|--------------------|----------------------|-------------------------------------------------|---------------|----------------------------------|
| <b>PA5-65593</b>   | <b>1:100</b>         | <b>Creb5</b>                                    | <b>Rabbit</b> | <b>Thermo Fisher</b>             |
| <b>MABT401</b>     | <b>1:50</b>          | <b>Prg4</b>                                     | <b>Mouse</b>  | <b>EMD Millipore</b>             |
| <b>11867423001</b> | <b>1:100</b>         | <b>HA</b>                                       | <b>Rat</b>    | <b>Sigma</b>                     |
| <b>AB5535</b>      | <b>1:100</b>         | <b>Sox9</b>                                     | <b>Rabbit</b> | <b>EMD Millipore</b>             |
| <b>18338S</b>      | <b>1:50</b>          | <b>Phospho-Smad2 (Ser465/Ser467)</b>            | <b>Rabbit</b> | <b>Cell Signaling Technology</b> |
| <b>A11029</b>      | <b>1:250</b>         | <b>anti-Mouse IgG; Alexa Fluor 488</b>          | <b>Goat</b>   | <b>Thermo Fisher</b>             |
| <b>A11037</b>      | <b>1:250</b>         | <b>anti-Rabbit IgG ; Alexa Fluor 594</b>        | <b>Goat</b>   | <b>Thermo Fisher</b>             |
| <b>A11006</b>      | <b>1:250</b>         | <b>anti-Rat IgG; Alexa Fluor 488</b>            | <b>Goat</b>   | <b>Thermo Fisher</b>             |
| <b>S11227</b>      | <b>1:250</b>         | <b>Streptavidin, Alexa Fluor™ 594 conjugate</b> |               | <b>Thermo Fisher</b>             |

**Supplementary Table 8: Growth factors and inhibitors used for chondrocyte culture**

|                                | <b>Cat. No.</b>    | <b>Concentration</b>          | <b>Vendor</b>          |
|--------------------------------|--------------------|-------------------------------|------------------------|
| <b>TGF-<math>\alpha</math></b> | <b>239-A-100</b>   | <b>100 ng/ml</b>              | <b>R&amp;D Systems</b> |
| <b>TGF-<math>\beta</math>2</b> | <b>302-B2-010</b>  | <b>20 ng/ml</b>               | <b>R&amp;D Systems</b> |
| <b>Doxycycline</b>             | <b>D9891-1G</b>    | <b>1 <math>\mu</math>g/ml</b> | <b>Sigma</b>           |
| <b>SB203580</b>                | <b>152121-47-6</b> | <b>10 <math>\mu</math>M</b>   | <b>TOCRIS</b>          |
| <b>SP600125</b>                | <b>129-56-6</b>    | <b>10 <math>\mu</math>M</b>   | <b>TOCRIS</b>          |

**Supplementary Table 9: Target sequence (sense strand) of in situ hybridization probes.**

|                            |                                                                                                                                                                                                                                                                                                                                                                                                                                                                                                                                                                                                                                                                                                                                                                                                                                                                                                                                                                                                                                                                                                                                                                                                                                                                                                                                                                                                                                                                                                                                                                                                                                                                                                                                                                                                                                                                                                                                                                                                                                                                                    |
|----------------------------|------------------------------------------------------------------------------------------------------------------------------------------------------------------------------------------------------------------------------------------------------------------------------------------------------------------------------------------------------------------------------------------------------------------------------------------------------------------------------------------------------------------------------------------------------------------------------------------------------------------------------------------------------------------------------------------------------------------------------------------------------------------------------------------------------------------------------------------------------------------------------------------------------------------------------------------------------------------------------------------------------------------------------------------------------------------------------------------------------------------------------------------------------------------------------------------------------------------------------------------------------------------------------------------------------------------------------------------------------------------------------------------------------------------------------------------------------------------------------------------------------------------------------------------------------------------------------------------------------------------------------------------------------------------------------------------------------------------------------------------------------------------------------------------------------------------------------------------------------------------------------------------------------------------------------------------------------------------------------------------------------------------------------------------------------------------------------------|
| <p><b>Prg4</b></p>         | <p>AGATTCAGAACAAACCTGAAGAAACAACCTCCTGCATCAGAAGATTCTGAT<br/> GATTCTAAAACAACCTCTAAAACCACAGAAGCCAACCAAAGCACCCAAGCC<br/> TACC AAAAGCCAACCAAAGCACCCAAGAAGCCACCTCTACCAAAAAGC<br/> CAAAGACACCAAAAACAAGAAAACCAAAAACCTACACCAGCTCCTCTAAAG<br/> ACGACTTCAGCAACACCTGAACTGAATACCACCCCTCTAGAAGTCATGCT<br/> GCCAACCACCACCATCCCTAAACAACCTCCAACCCTGAAACAGCTGAAG<br/> TAAATCCAGATCATGAAGATGCAGATGGAGGTGAAGGAGAAAAACCTCT<br/> GATTCCCGGGCCCCCTGTGCTATTCCCCACAGCTATTCCAGGCACTGATC<br/> TTTTGGCCGGGAGACTCAATCGAGGCATTAACATCAATCCCATGCCTTCA<br/> GATGAGACCAATTTATGCAATGGTAAGCCAGTGGATGGACTGACTACGCT<br/> GCGCAATGGGACATTAGTTGCATTTGAGGGTCATTATTTCTGGATGCTGA<br/> ATC</p>                                                                                                                                                                                                                                                                                                                                                                                                                                                                                                                                                                                                                                                                                                                                                                                                                                                                                                                                                                                                                                                                                                                                                                                                                                                                                                                                                                                                                                 |
| <p><b>Murine Creb5</b></p> | <p>GCCTGTCCCAGGCTCTCTATCATCTCTACTCCATCTCCACAACAGACAGAG<br/> GCAGCCCATGCCGGCCTCCATGCCTGGAACCCTGCCAACCCACCATGC<br/> CAGGATCTTCTGCCGTCTTGATGCCTATGGAGAGACAGATGTCAGTGAAC<br/> TCCAGCATCATGGGCATGCAAGGTCCAAACCTCAGCAACCCCTGTGCTTC<br/> TCCCCAAGTCCAGCCAATGCATTGAGAAGCCAAAATGAGACTGAAGGCTG<br/> CGCTGACTCACCATCCTGCCGCCATGTCGAACGGGAACATGAGCACCATC<br/> GGACACATGATGGAGATGATGGGCTCCCGGCAAGACCAGACACCCGACC<br/> ACCACCTGCACTCACACCCGCATCAGCACCAGACACTGCCGCCACCAC<br/> CCCTACCCACACCAGCACCAGCACCCTCCACACCATCCCCACCCACAGCCT<br/> CACCACCAGCAGAACCACCCGCACCACCCTCCATTCCACCTTCACGCA<br/> CACCCGGCGCACCACCAGACCTCGCCACACCACCCCTGCACACCCGGCAA<br/> CCAAGCACAGGTTTACCAGCTACACAACAGATGCAGCCAACCCAGACAA<br/> TACAACCACCCAGCCACAGGGGGACGCCGGCGAAGAGTGGTGGATGA<br/> GGACCCAGATGAGAGGCGGAGGAAATTTCTGGAAAGGAACCCGGGCC<br/> GCCACCCGCTGCAGACAGAAGAGGAAGGTCTGGGTGATGTCAGTGGAAA<br/> AGAAAGCTGAAGAGCTCACCCAGACAAACATGCAGCTTCAGAATGAAGT<br/> GTCCATGTTGAAAAACGAGGTGGCCAGCTGAAGCAGTTGTTGTTAACAC<br/> ATAAAGACTGTCCGATAACAGCCATGCAGAAAGAATCCCAAGGGTATTTA<br/> AGTCCAGAGAGCAGCCCTCCTGCGAGCCCTGTGCCAGCATGCTCTCAGCA<br/> GCAAGTTATCCAACACAACACCATCACTACATCCTCATCGGTCAGCGAGG<br/> TCGTGGGGAGCTCCACCCTCAGTCAGCTTACAACCTCACAGAACAGACCTG<br/> AATCCTATTCTTTAAAAGGCATCGGTCAAACCTGGCCTTTGAGAAGAGCT<br/> GTAGCATGCCGTACATCCTTTCTCAAAGGGGCATTTTTTTTAGAATTATCT<br/> CAGACCTGGAAGACGCCTCAGCCCTTCAAAGACTGGCTTTCATTTTTATA<br/> GTTATTATGAAAATGTTGTCTTTTATACTTAGTTATATAAGAAAAAAGGG<br/> AGATATGCAATGAATATCTATCAGCTTGGGGAGCACGTTGGTGCTTCTCT<br/> GCAATTTTCTGGTACCAGTTTCTTGTTTATAAACGGAACCTTTCTGTATA<br/> TAGCCATGGTTTTATTCTTACCAGCCCAACCCTTTGCCTGGAACAATGAAT<br/> CTTGTTCAACTACAGCTTTTAGCCAAAATGAGGTATGCTTAGATGTCAAG<br/> CGAGATGGATCCACACAGTAACTGGGTGGGAAAGCTCATGATGTCATAA<br/> CTCATGTTGAGTTTGTGCTGTGATGTCACCAGAATCTCAGATAAACACAT<br/> GGGCCTTCTGAATATTTTTTCTTGTGCTAGAAAAAATAAATTATGGTCC<br/> ATCCATATCCCATGAAAGCCACCAAGCATCTCAGGCCCCCTCCTTCTCTC<br/> TTTTCTACTTGTGCAGATGTCCAATATCCATCTCATTTTTCTTTCCCGGA<br/> TCCCTTGTTTACTCTTTGTTTTGACTTTTTTTCTGTTTCTTTTCTCCCTT<br/> TAGCTTTGCATGTAAAAAGAAAATAATGTTTAAAGAAGAGAAAAAGCAA</p> |

|                  |                                                                                                                                                                                                                                                                                                                                                                                                                                                                                                                                                                                                                                                                                                                                                                                                                                                                                                                                                                                                                                                                                                                                                                                             |
|------------------|---------------------------------------------------------------------------------------------------------------------------------------------------------------------------------------------------------------------------------------------------------------------------------------------------------------------------------------------------------------------------------------------------------------------------------------------------------------------------------------------------------------------------------------------------------------------------------------------------------------------------------------------------------------------------------------------------------------------------------------------------------------------------------------------------------------------------------------------------------------------------------------------------------------------------------------------------------------------------------------------------------------------------------------------------------------------------------------------------------------------------------------------------------------------------------------------|
|                  | <p>ATCTGGAAACTGTGGACCTAGCCACAGTTTAAACCCACAGCTGGAGTTCAT<br/> TCAATTTTTGCCTTTCACAAAATAGCAACCAGGAGATGTTTAAATGTGCCT<br/> GATTTAATGTTTTAATAACCAGAGCAAATAAAAAGGTGGTTTGGTTATAG<br/> GTGAAGCACTGTTGAATGCCAGCTGTGGGGACACTAGGGAAAGGGACTT<br/> CGTAAGCTCCAACCTGTGAAAATTCAAATAAGGATGTGGGCTCTAACATCA<br/> CACCTCGAATTACAGCTCGCTTCTATGGCCTGTCTATAATGTAAAAAATC<br/> CATGCACTATATAATAGTTCAGAAGGGCTCTGTTCACTACACAGATTACA<br/> TTGTTCAATCATCAGCTGCTAATAACCTAAGATTTATTATTATTATTTTTC<br/> TTAAGCCTATGGAACCAGCTCTGCTGTTCTGGTGGGCAAAGCAAACCTCA<br/> CTCTTGGAGCAACAGAGAGAAAGCGAGGCCAGCGTTTCTCGGGGACTCG<br/> CAGTCTGCCAGAACAGTCAGACTCCTTGGCTGCTGACCGAGTCCCATGGA<br/> GGTGGCCAGGCTGGTGCCTCATCTGAGTAGTTCTGATTTATATTTTTCAG<br/> CAATGTCCACGGACTTGCCATTACAGAAAGCAGATCAAACCCAAACCAC<br/> AGTTGTGCCTCCTTGAAACAAGCCATTCTACTCTGCTGGTGTTTTACTATC<br/> GTGTTTACAAAATAATAGGGGCTAATGTTTCTCACTAGCAGTCTGGGCAT<br/> ATGCTGGTGTTCATCTCTGCCAAATAAATCACCTCCTAACCTATGTGTG<br/> TGTGTGTGTGCACATGGATGTGTGTGCCTGAGTGTGTGAGTGTGTGTGT<br/> GTGTGTGTGTGTGTGTGTGTGTGTGTTTATGAACAGTATAGGTTTTAAAGA<br/> ACAGTATTTTACAAAAGCCATCACTTTTATAAGAGTTCTGTAAAGGAAGG<br/> ATGTACTTCTTCGCTCACTATAGTTTTAAAAAATTTCTATTTTAGAGGAAAA<br/> AAAAAAAAAAAAAAAAA</p> |
| <b>Col2a1</b>    | <p>CCTGTCTGCTTCTTGTAACCCCGAACCTGAAACAACACAATCCATTG<br/> CGAACCCAAAGGACCCAAACACTTTCCAACCGCAGTCACTCCAGGATCTG<br/> CACTGAATGGCTGACCTGACCTGATGATACCCAACCGTCTCCCCTCACA<br/> GCCCCGACTGTGCTCCCCTTTCTAAGAGACCTGAACTGGGCAGACTGCAA<br/> AATAAAATCTCGGTGTTCTATTTATTATTGTCTTCTGTAAGACCTCTGG<br/> GTCCAGGCGGAGACAGGAATCTGGTGTGAGTCAGACGCCCCCGAG<br/> TGACTGTTCCAGCCAGCCAGAAGACCCCTACAGATGCTGGGCGCAGG<br/> GACTGCGTGTCTACACAATGGTGTATTCTGTGTCAAACACCTCTGTAT<br/> TTTTTA</p>                                                                                                                                                                                                                                                                                                                                                                                                                                                                                                                                                                                                                                                                                                                              |
| <b>Matrilin1</b> | <p>GGATCCAAGAGCGTGCGGCCTGAGAACTTTGAGCTGGTGAAGAAGTTCA<br/> TCAACCAGATTGTGGACACGTTAGATGTGTGCGGACAGGCTAGCCCAGGT<br/> GGGGCTGGTGCAGTACTCCAGCTCCATTCGCCAGGAGTTCCCACTCGGCC<br/> GCTTCCACACCAAGAAGGACATTAAGGCCGCGGTGCGGAACATGTCTTAC<br/> ATGGAGAAAGGCACCATGACTGGCGCCGCTTGAAGTATCTCATAGATAA<br/> TTCTTTCACTGTGTCCAGCGGGCAAGGCCTGGAGCCCAGAAGGTGGGC<br/> ATCGTCTTACCAGATGGCCGGAGCCAGGACTACATTAATGACGCTGCCAG<br/> GAAGGCCAAGGACCTTGGCTTTAAGATGTTTGGCGTGGGCGTGGGCAAT<br/> GCTGTGGAGGAAGAGCTGAGGGAGATCGCTTCCGAGCCCGTGGCAGACC<br/> ACTACTTTTACACAGCTGACTTCAAGACCATCAACCAGATTGGCAAGAAG<br/> CTGCAGAAACAAATCTGTGTGGAGGAAGACCCCTGTGCTTGTGAGTCCAT<br/> ACTGAAATTTGAGGCCAAGGTGGAGGGTCTGCTGCAGGCCCTGACCAGG<br/> AAGCTGGAAGCTGTGAGCGGGCGGCTGGCTGTCCTGGAGAACAGAATCA<br/> TCTAA</p>                                                                                                                                                                                                                                                                                                                                                                                                                                |

**Supplementary Table 10: PCR primers for human *PRG4* and *GAPDH***

| <b>Gene</b>         | <b>Forward</b>         | <b>Reverse</b>          |
|---------------------|------------------------|-------------------------|
| <b><i>PRG4</i></b>  | TGTGACTGCGACGCCCAATGTA | GGTTTGAGATGCTCCTGAAGGTG |
| <b><i>GAPDH</i></b> | GTCTCCTCTGACTTCAACAGCG | ACCACCCTGTTGCTGTAGCAA   |
