# Supplementary material for: Creb5 establishes the competence for Prg4 expression in articular cartilage
Source: PubMed Central journal article supplement (PMC7955038; doi:10.1038/s42003-021-01857-0), 2021-03-12
Supplement: 42003_2021_1857_MOESM2_ESM.pdf [file 42003_2021_1857_MOESM2_ESM.pdf]

## Description of Additional Supplementary Files

**File Name:** Supplementary Data 1

**Description:** List of genes that are differentially expressed in superficial versus deep zone bovine articular chondrocytes. 320 genes are listed whose expression differed (by indicated LogFC) in superficial versus deep zone articular chondrocytes (false discovery rate, FDR <0.05).

**File name:** Supplementary Data 2

**Description:** Primary data for graphs and charts
